# Supplementary material for: Complex Ecotype Dynamics Evolve in Response to Fluctuating Resources
Source: PubMed Central journal article supplement (PMC9239185; doi:10.1128/mbio.03467-21), 2022-05-16

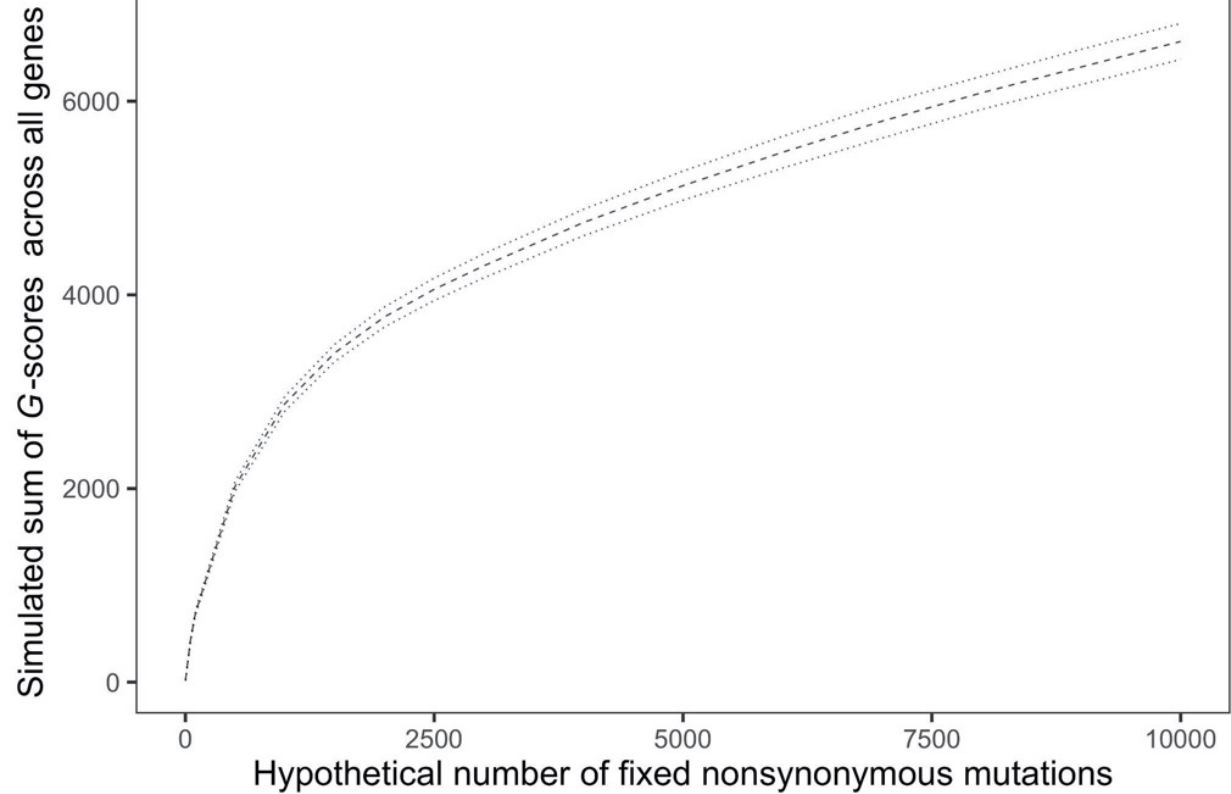

Supplement: mbio.03467-21-s0003.pdf [file mbio.03467-21-s0003.pdf]
